# Supplementary material for: Hybrid materials from organic electronic conductors and synthetic-lignin models for charge storage applications
Source: Royal Society of Chemistry journal article supplement (doi:10.1039/c5ta06821e), 2016-01-01
Supplement: c5ta06821e1.pdf [file c5ta06821e1.pdf]

## Hybrid materials from organic electronic conductors and synthetic-lignin models for charge storage application

Tomasz Rębiś<sup>†a,b</sup>, Ting Yang Nilsson<sup>†a</sup>, Olle Inganäs<sup>\*a</sup>

<sup>a</sup> *Biomolecular and Organic Electronics, IFM, Linköping University, S-581 83 Linköping, Sweden, Email: oling@ifm.liu.se*

<sup>b</sup> *Institute of Chemistry and Technical Electrochemistry, Faculty of Chemical Technology, Poznań University of Technology, Berdychowo 4, 60-965 Poznań, Poland*

<sup>†</sup> Tomasz Rębiś and Ting Yang Nilsson contributed equally to this work

### Supporting Information

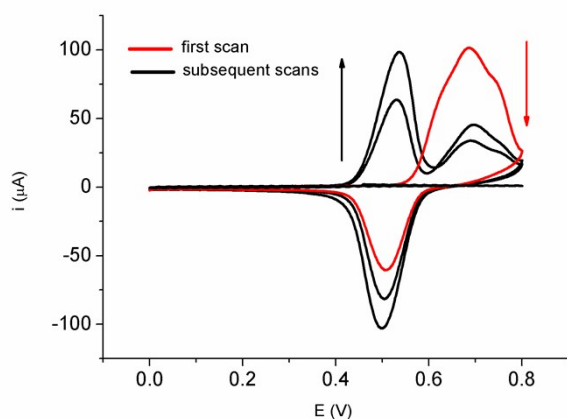

Fig. S1. Successive cyclic voltammograms of ferulic acid on SWCNT showing the demethoxylation process occurring during first cycles.

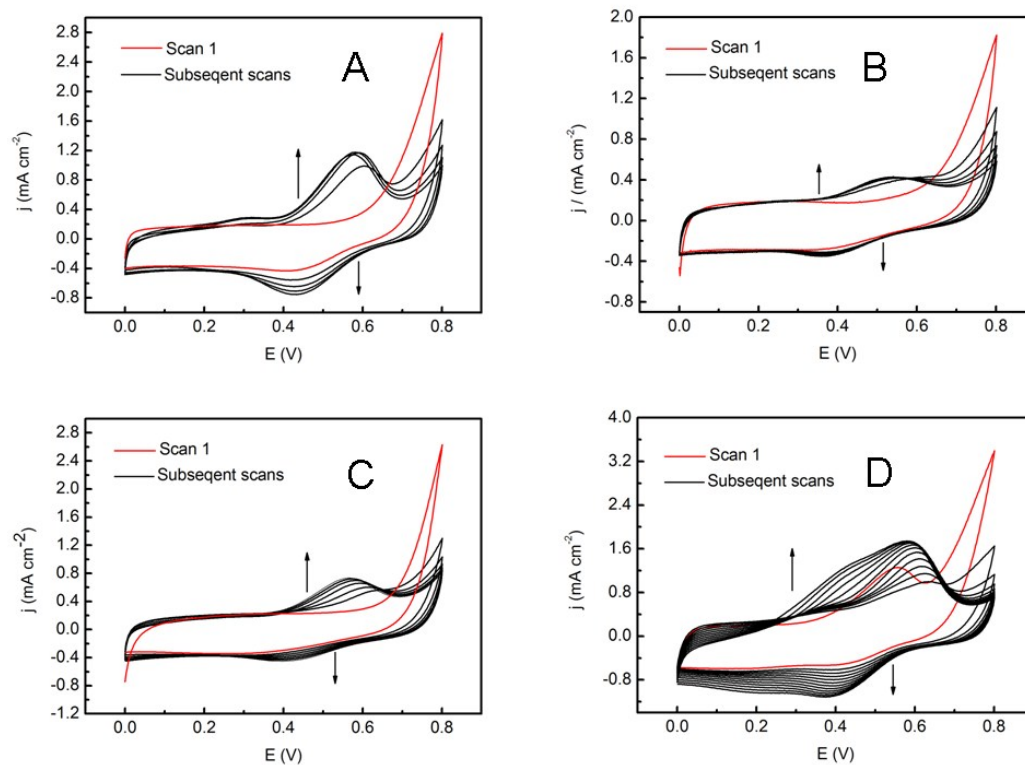

Fig. S2. Successive cyclic voltammograms of PolyG/PPy (A), PolyS/PPy (B), Poly/S/SG/PPy (C) and Poly/S/GHQ/PPy (D) showing the demethoxylation process occurring during first cycles.
